# Supplementary material
Source: Springer Nature journal article supplement (https://www.springermedizin.de/resource/supplementary/12874_2008_284_MOESM1_ESM.pdf/9434152)
Supplement: MOESM1 [file 9434152]

Full study population in general

|             |   | Disease |       |       |
|-------------|---|---------|-------|-------|
|             |   | +       | -     |       |
| Test result | + | a       | b     | a + b |
|             | - | c       | d     | c + d |
|             |   | a + c   | b + d |       |

Full study population, example

|             |   | Disease |     |     |
|-------------|---|---------|-----|-----|
|             |   | +       | -   |     |
| Test result | + | 30      | 100 | 130 |
|             | - | 10      | 300 | 310 |
|             |   | 40      | 400 |     |

Nested case-control sample,  
sampling fraction  $160 / 400 = 0.40$

|             |   | Disease |     |     |
|-------------|---|---------|-----|-----|
|             |   | +       | -   |     |
| Test result | + | 30      | 40  | 70  |
|             | - | 10      | 120 | 130 |
|             |   | 40      | 160 |     |
